# Supplementary material for: Ultrasound-enhanced Tumor Penetration of Carrier-free Nanodrugs for High-efficiency Chemo-photodynamic Therapy of Breast Cancer
Source: Preprints.org preprint supplement (doi:10.20944/preprints202410.2116.v1), 2024-10-28
Supplement: Supplementary file 1 [file supplementary]

**Supporting Information**

**Ultrasound-enhanced Tumor Penetration of Carrier-free Nanodrugs for High-efficiency Chemo-photodynamic Therapy of Breast Cancer**

*Yun Xianga, Shiyu Liangb, Ping Wanga**

a Department of Ultrasound, The Third Affiliated Hospital, Southern Medical University, Guangzhou 510630, Guangdong Province, PR China

b NMPA Key Laboratory for Research and Evaluation of Drug Metabolism & Guangdong Key Laboratory of New Drug Screening, School of Pharmaceutical Sciences, Southern Medical University, Guangzhou 510515, Guangdong Province, PR China


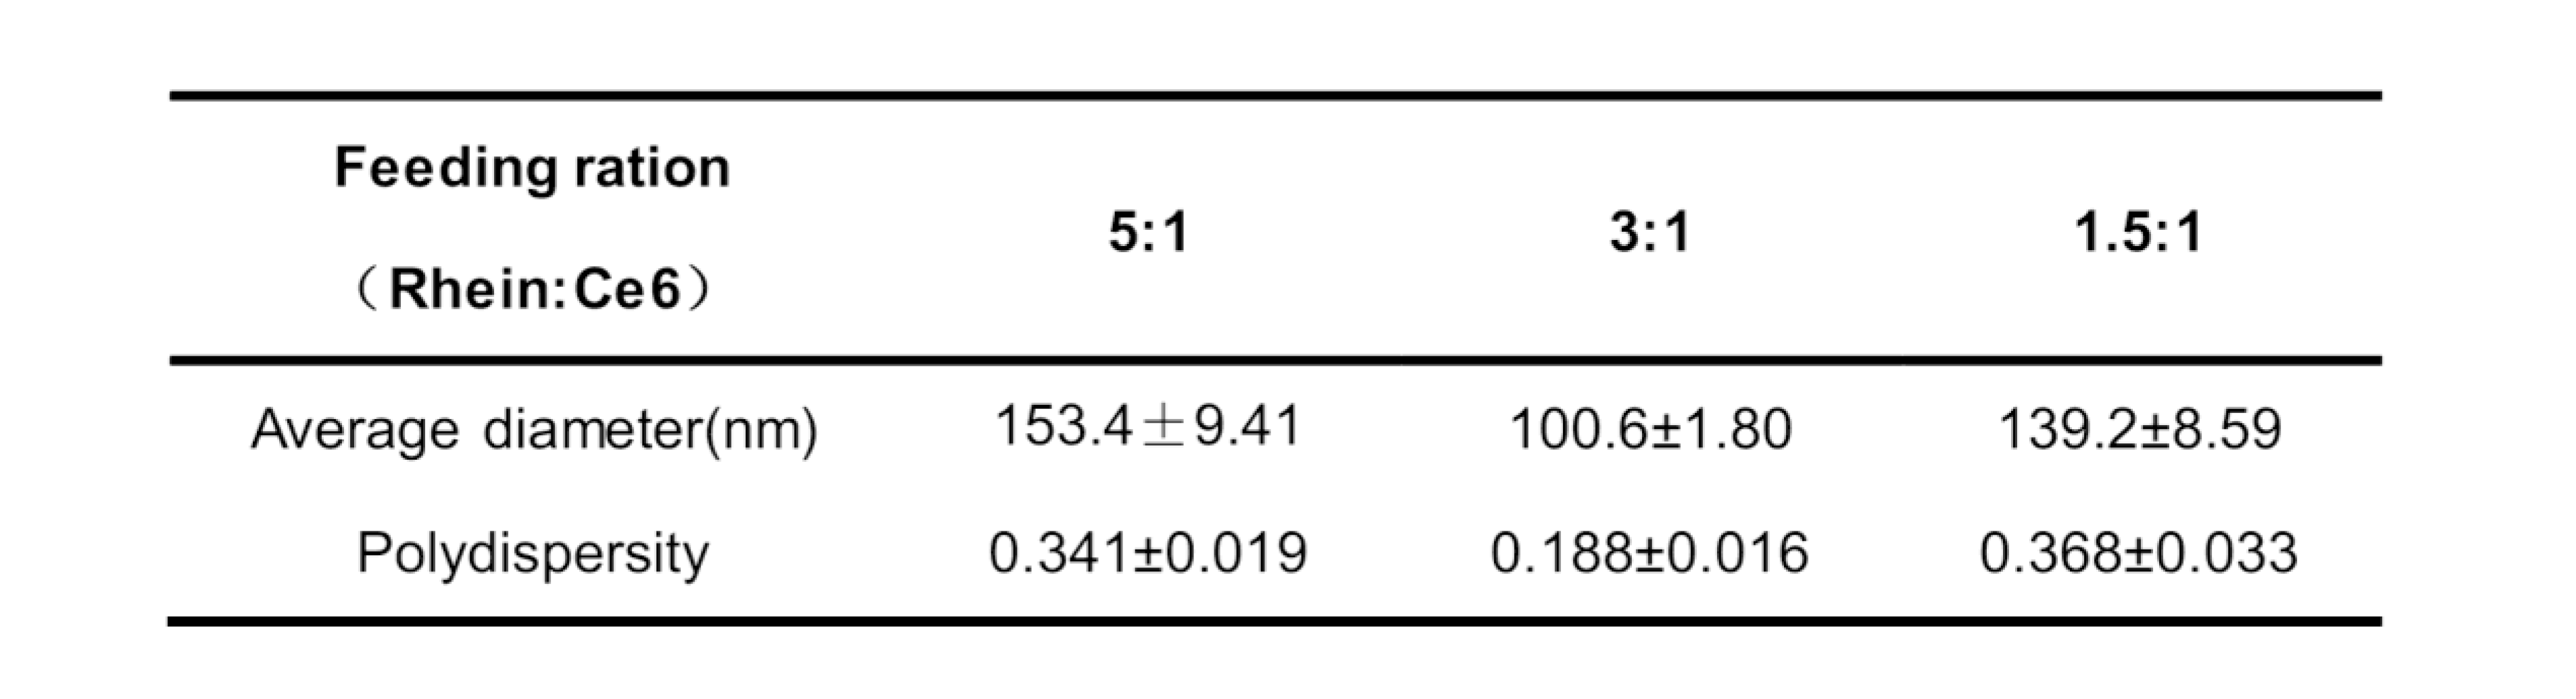


**Table S1.** Particle sizes and PDI values of the obtained RC NPs at different molar ratios of Rhe and Ce6. The error bars indicate means ± SD, n = 3.


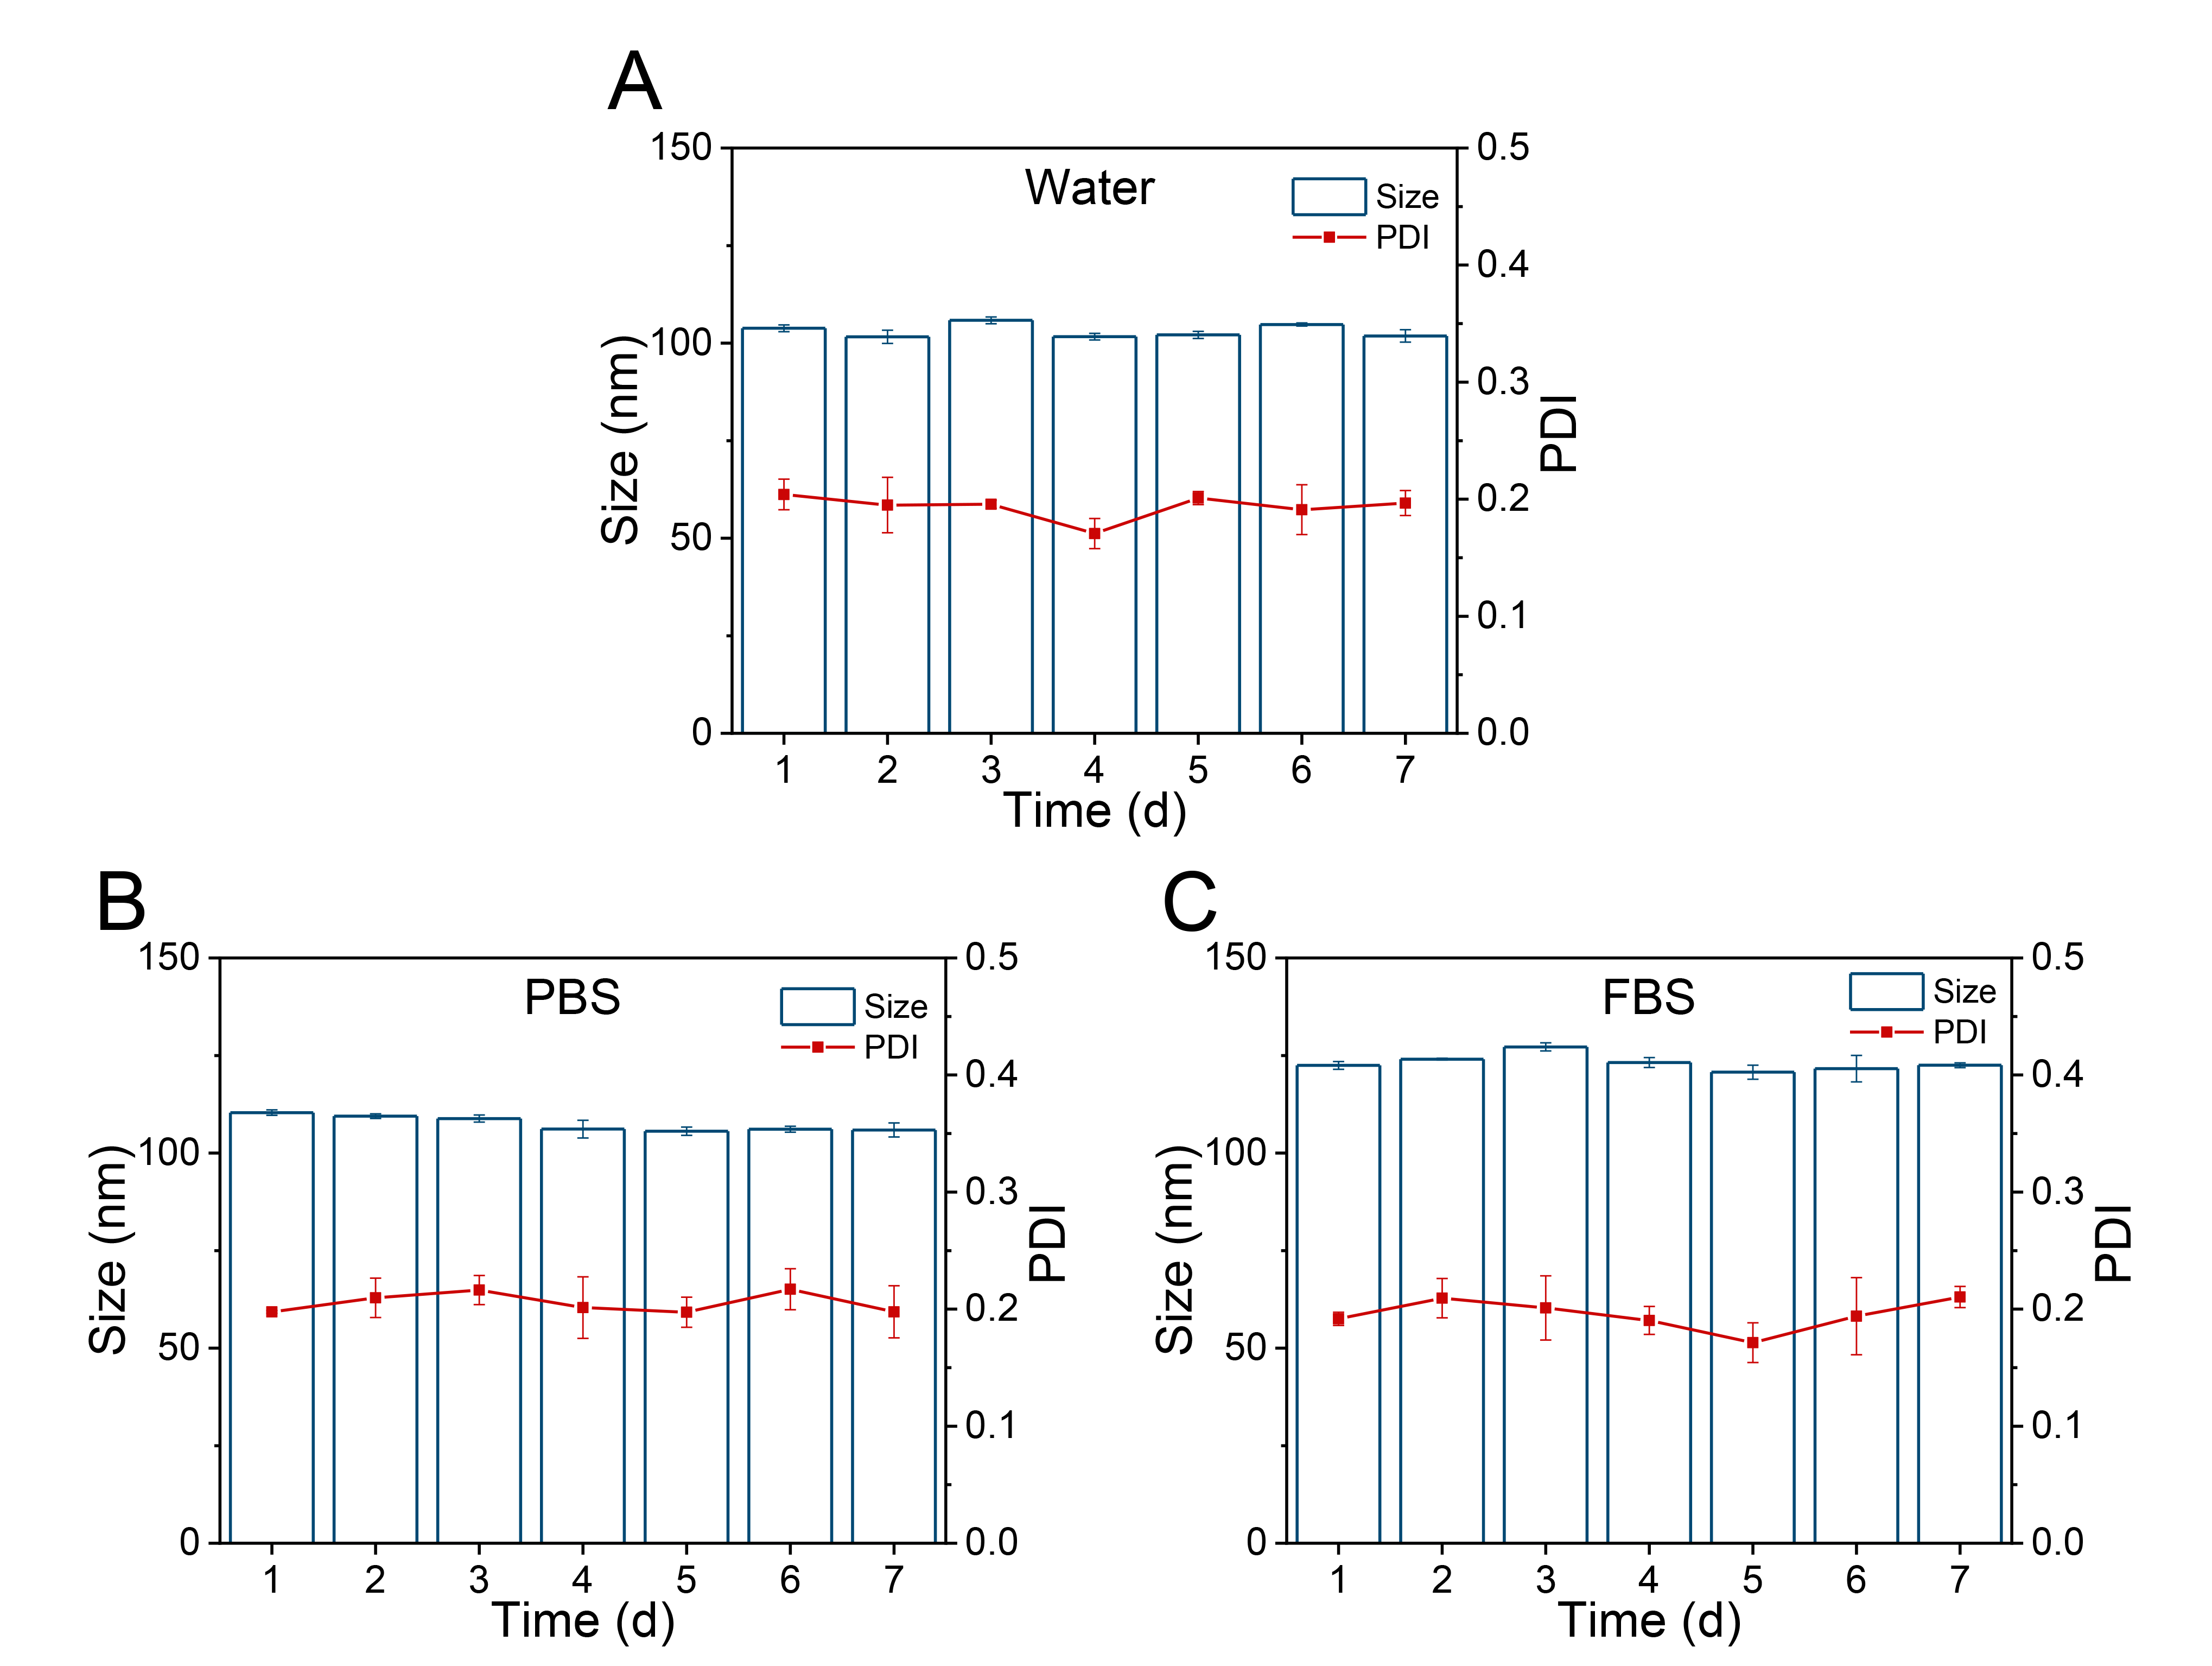


**Figure S1.** The changes in particle size distribution and polydispersity index (PDI) of RC NPs in (A) water, (B) PBS, and (C) 10% FBS within 7 days. The error bars indicate means ± SD, n = 3, * p <0.05, ** p <0.01, and *** p <0.001; NS indicates p >0.05.


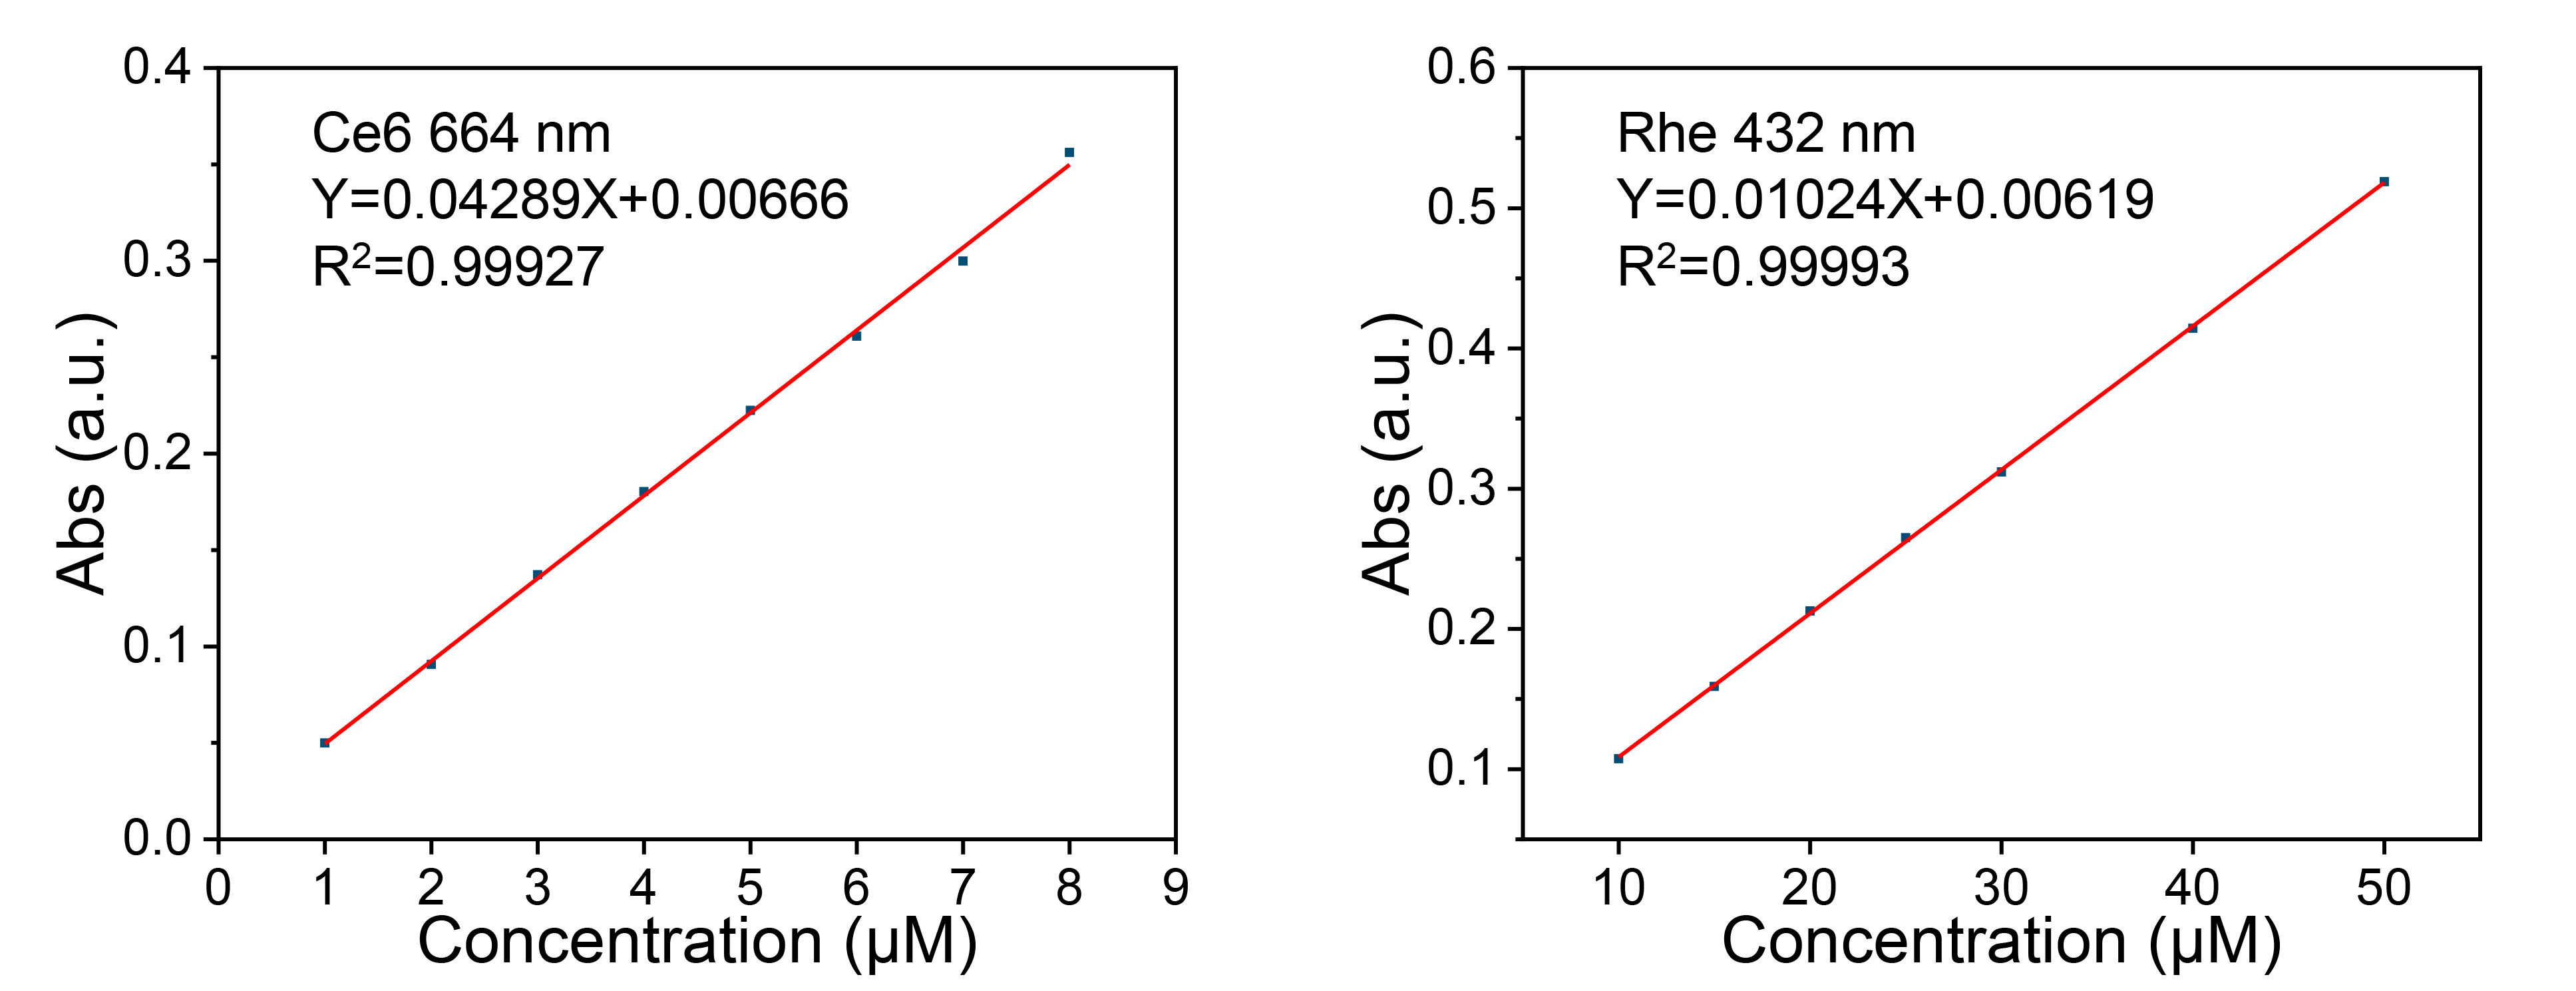


**Figure S2.** Standard curves of (A) Ce6 and (B) Rhe detected by UV-vis spectrum and HPLC.


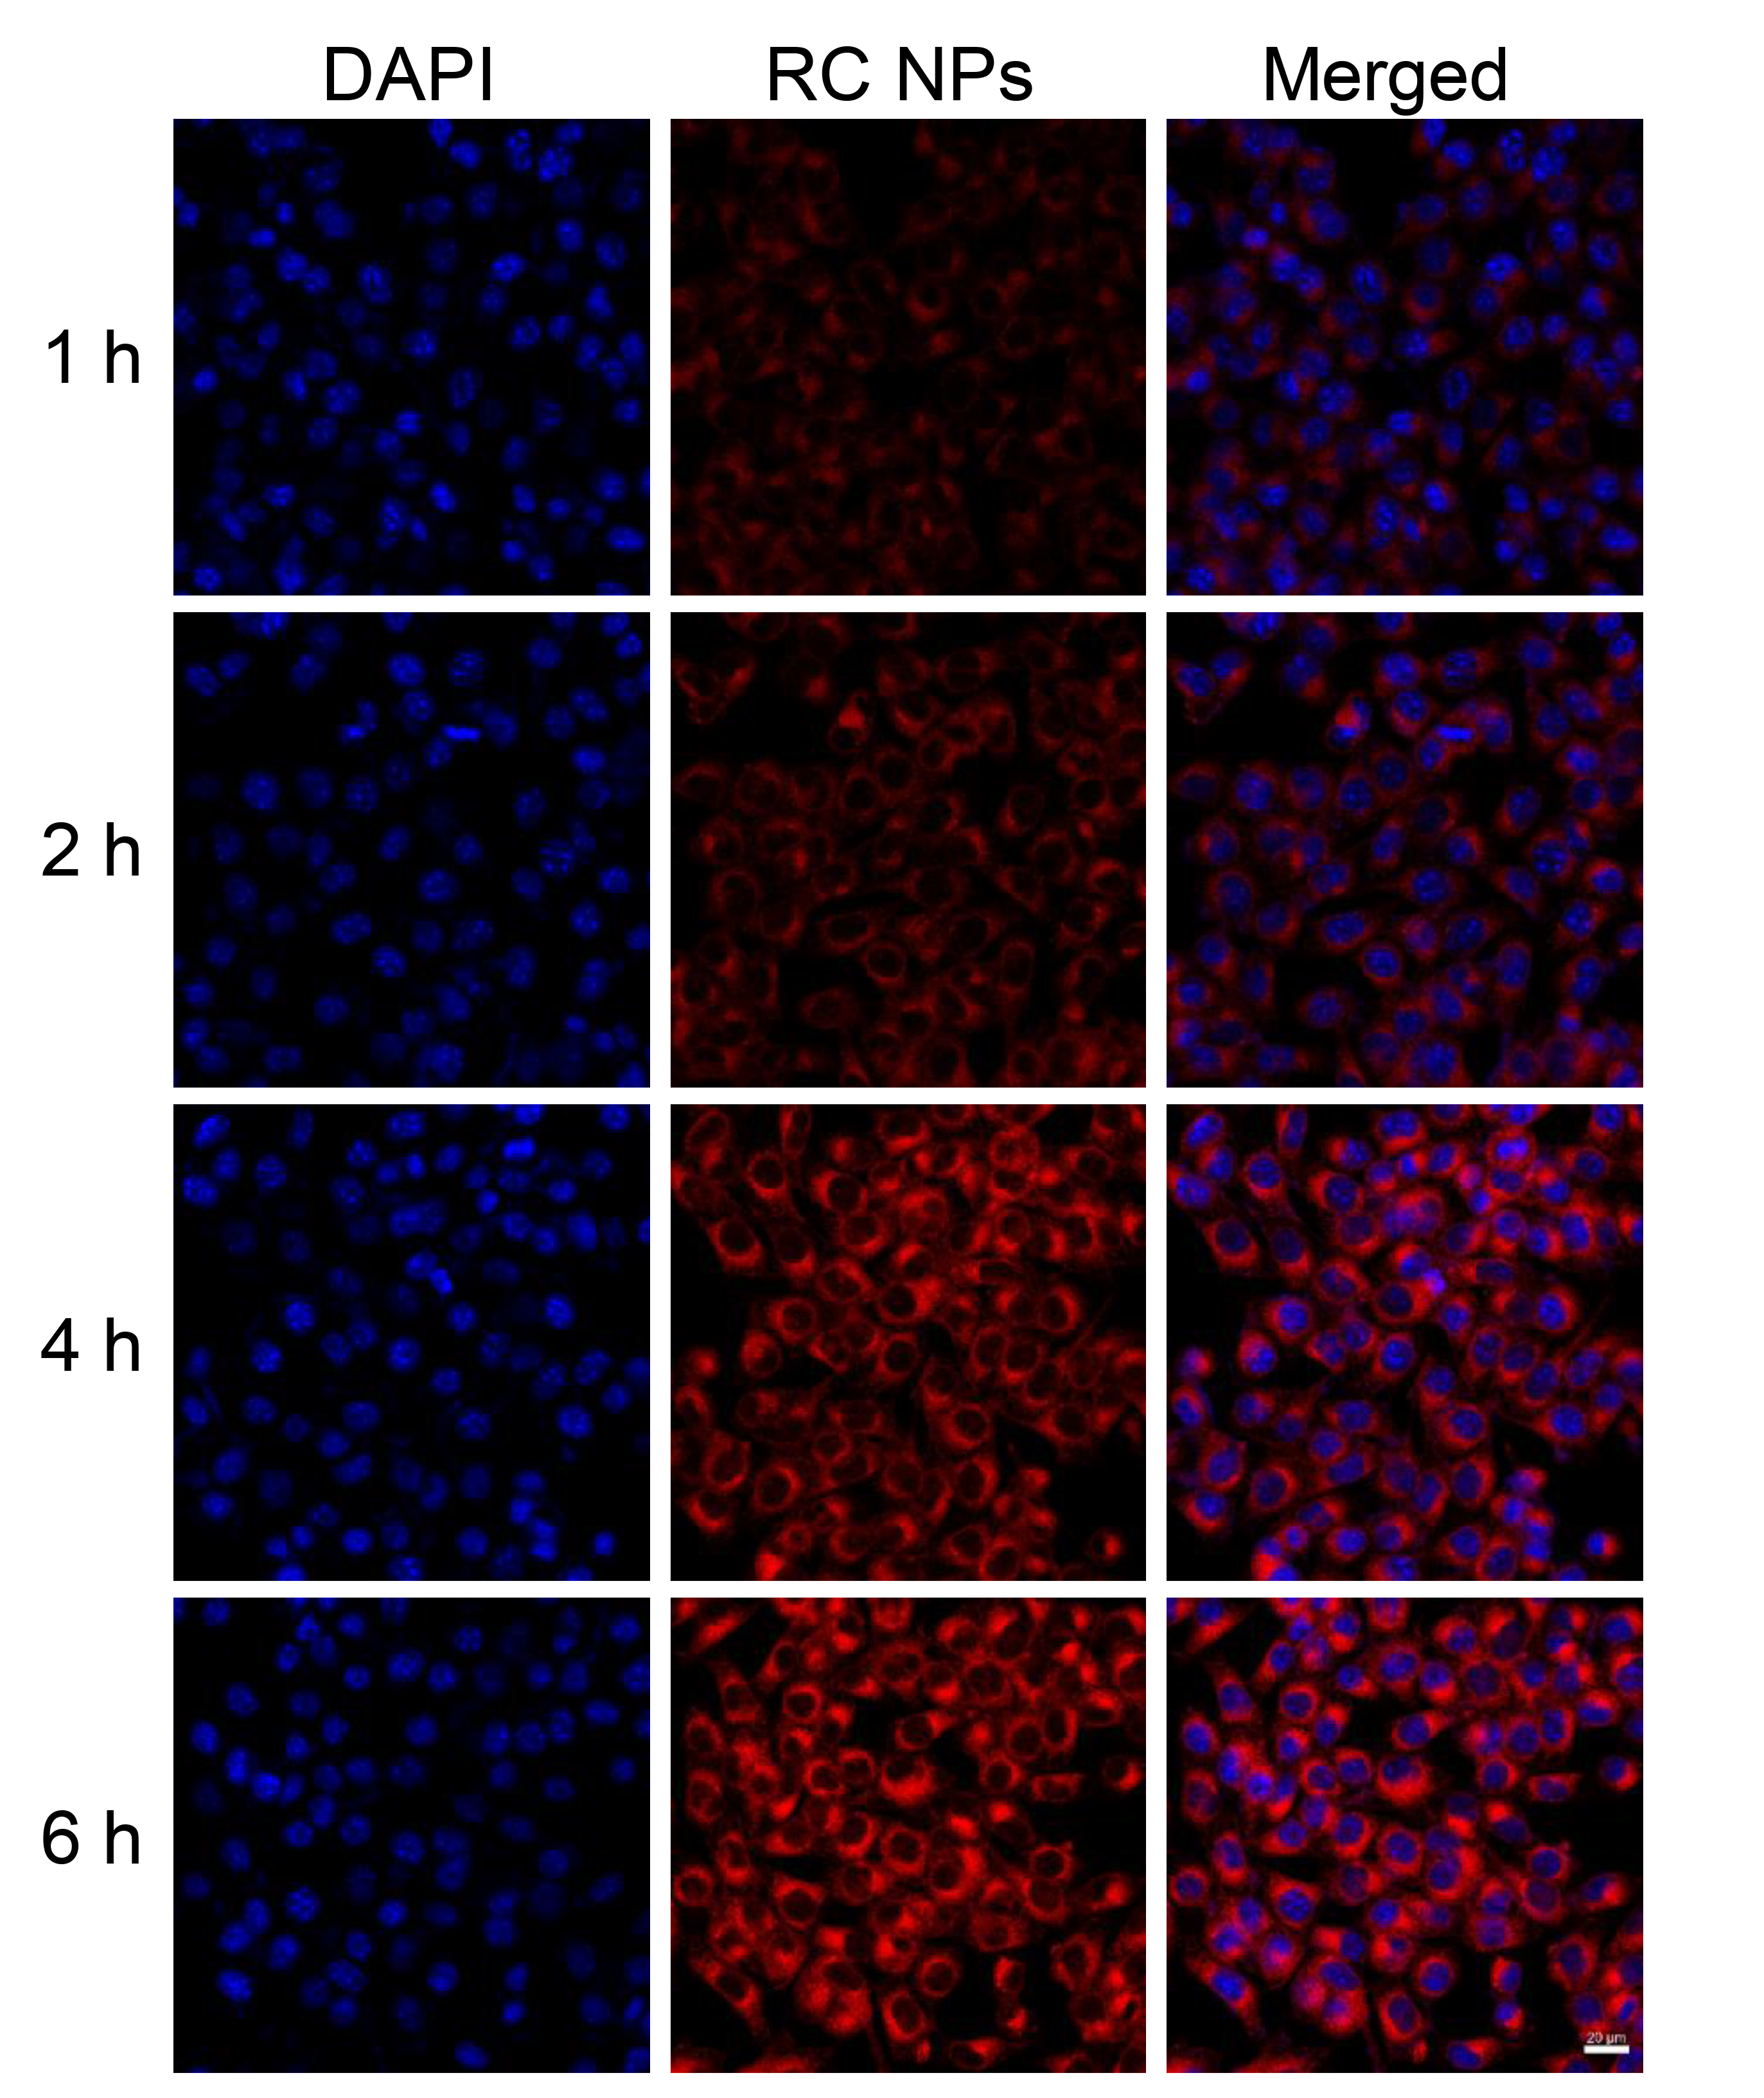


**Figure S3.** CLSM images of the intracellular uptake of RC NPs in 4T1 cells at different time points. Scale bar: 20 μm.


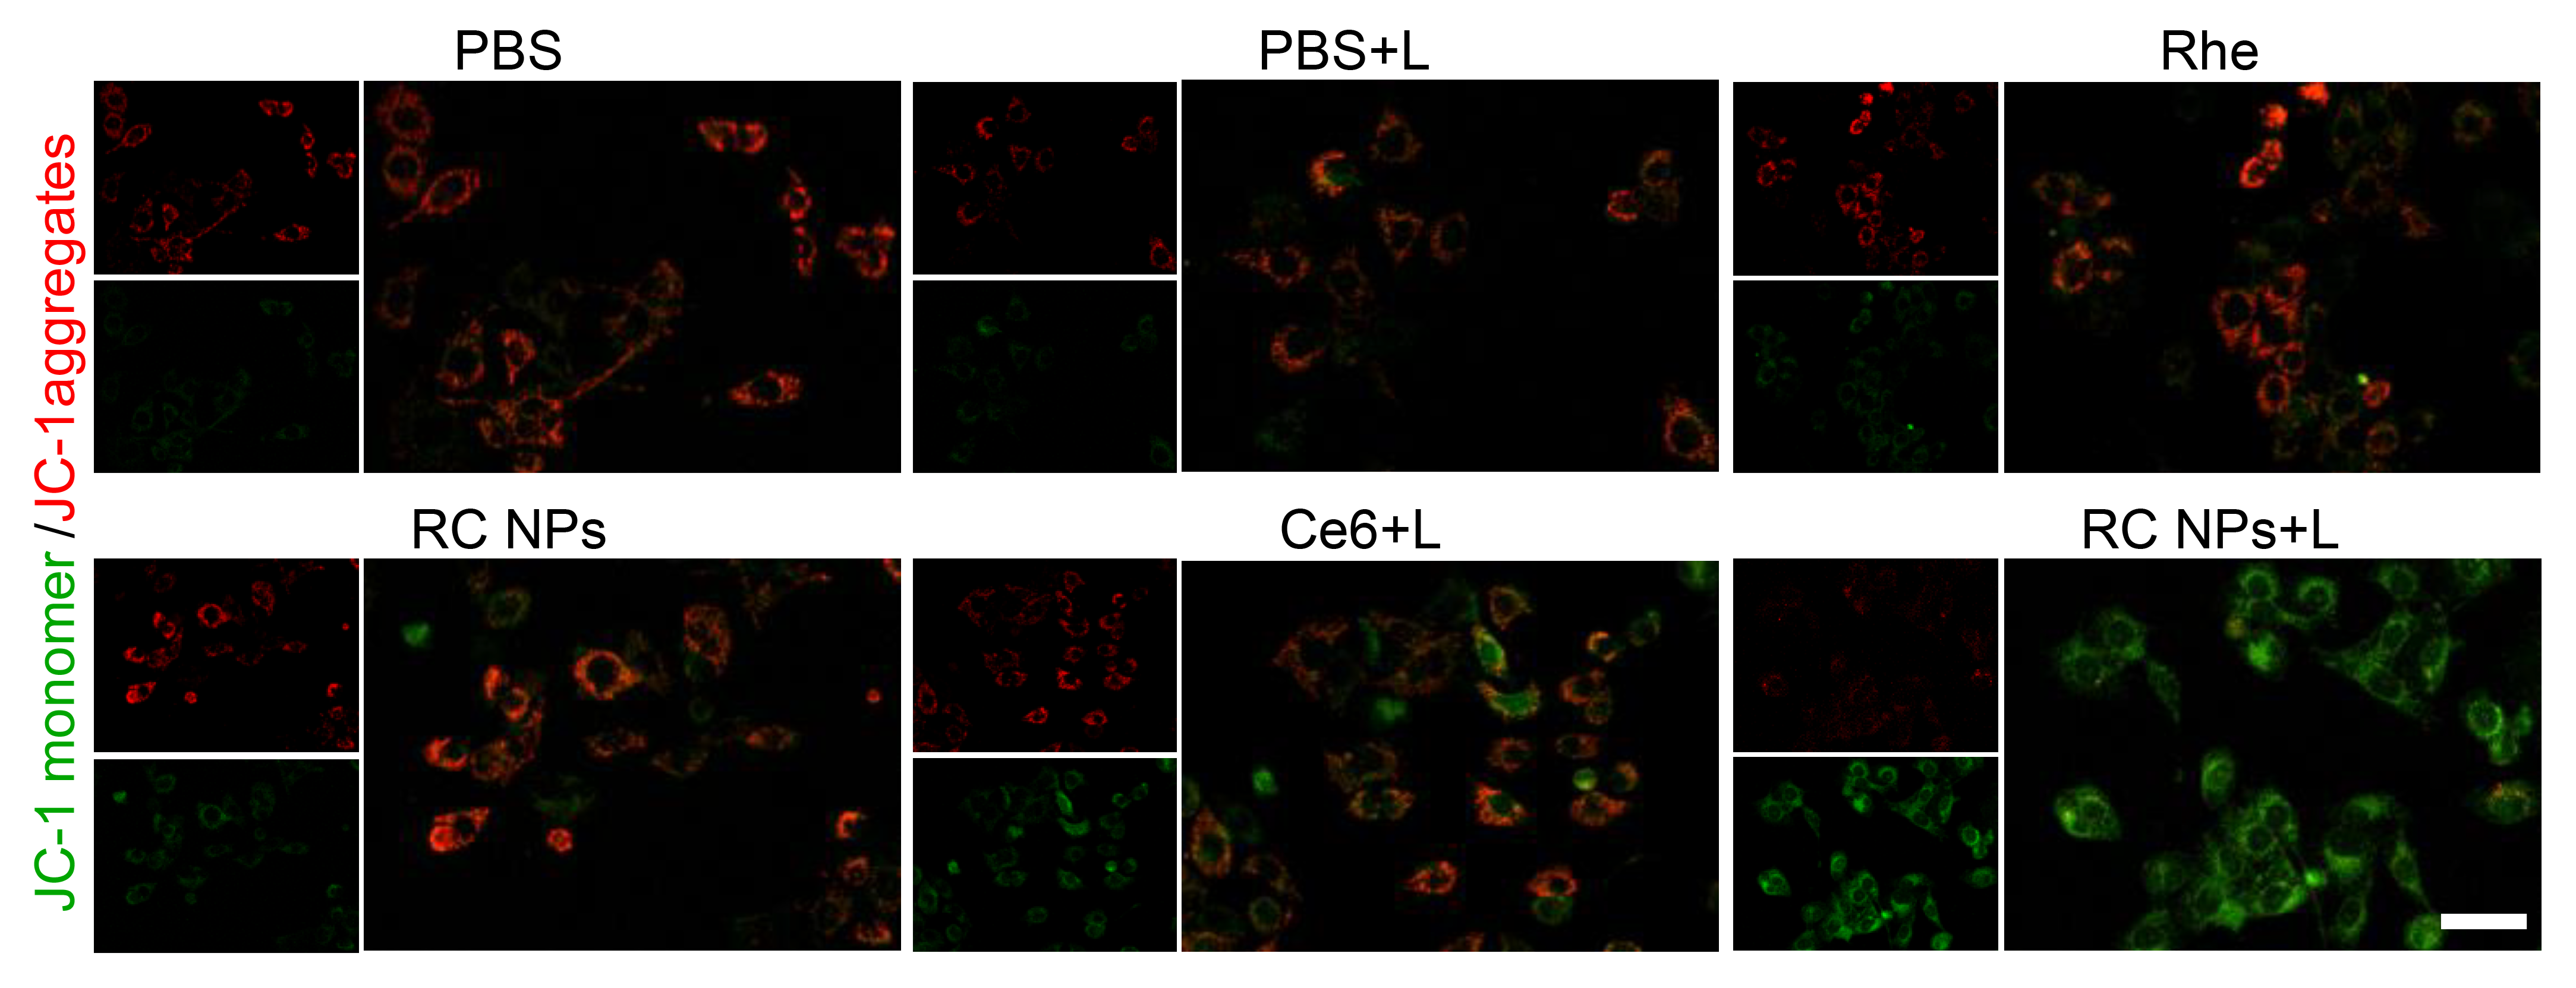


**Figure S4.** CLSM images obtained from 4T1 cells stained with JC-1 after various treatments. Scale bar: 50 μm.


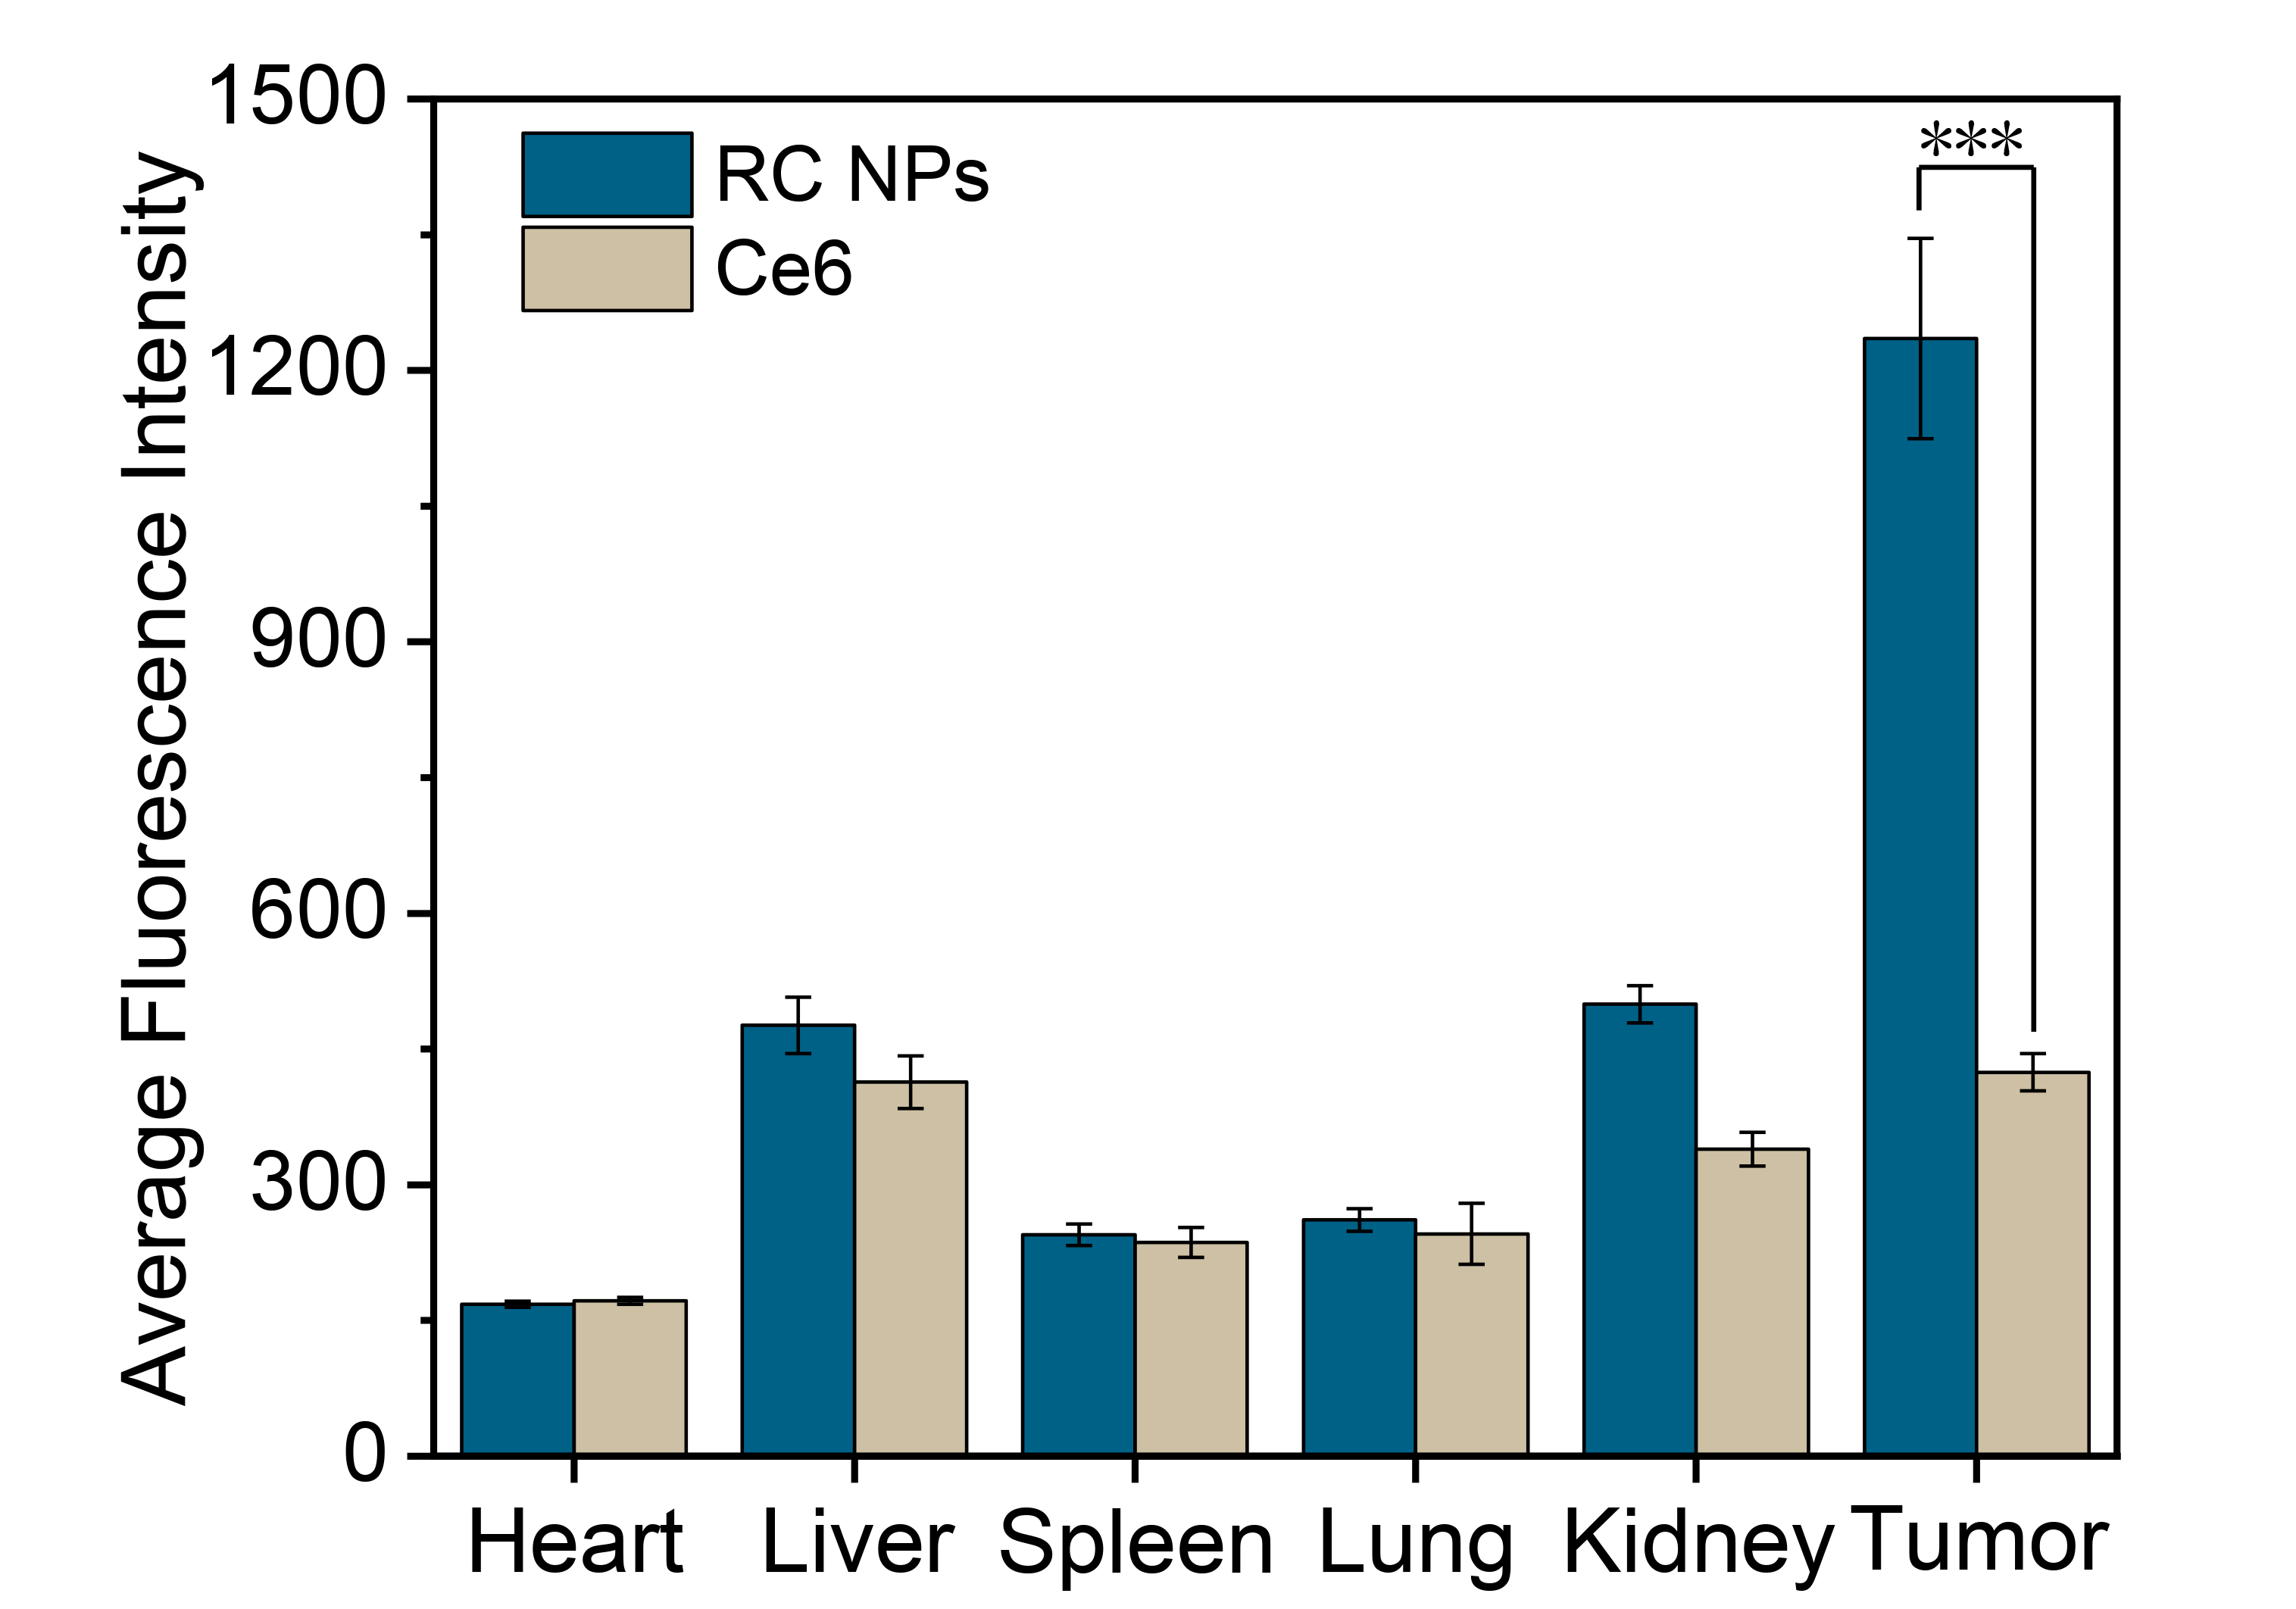


**Figure S5.** Fluorescence quantitative analysis of major organs and tumor tissues. The error bars indicate means ± SD, n = 3, * p <0.05, ** p <0.01, and *** p <0.001; NS indicates p >0.05.

**
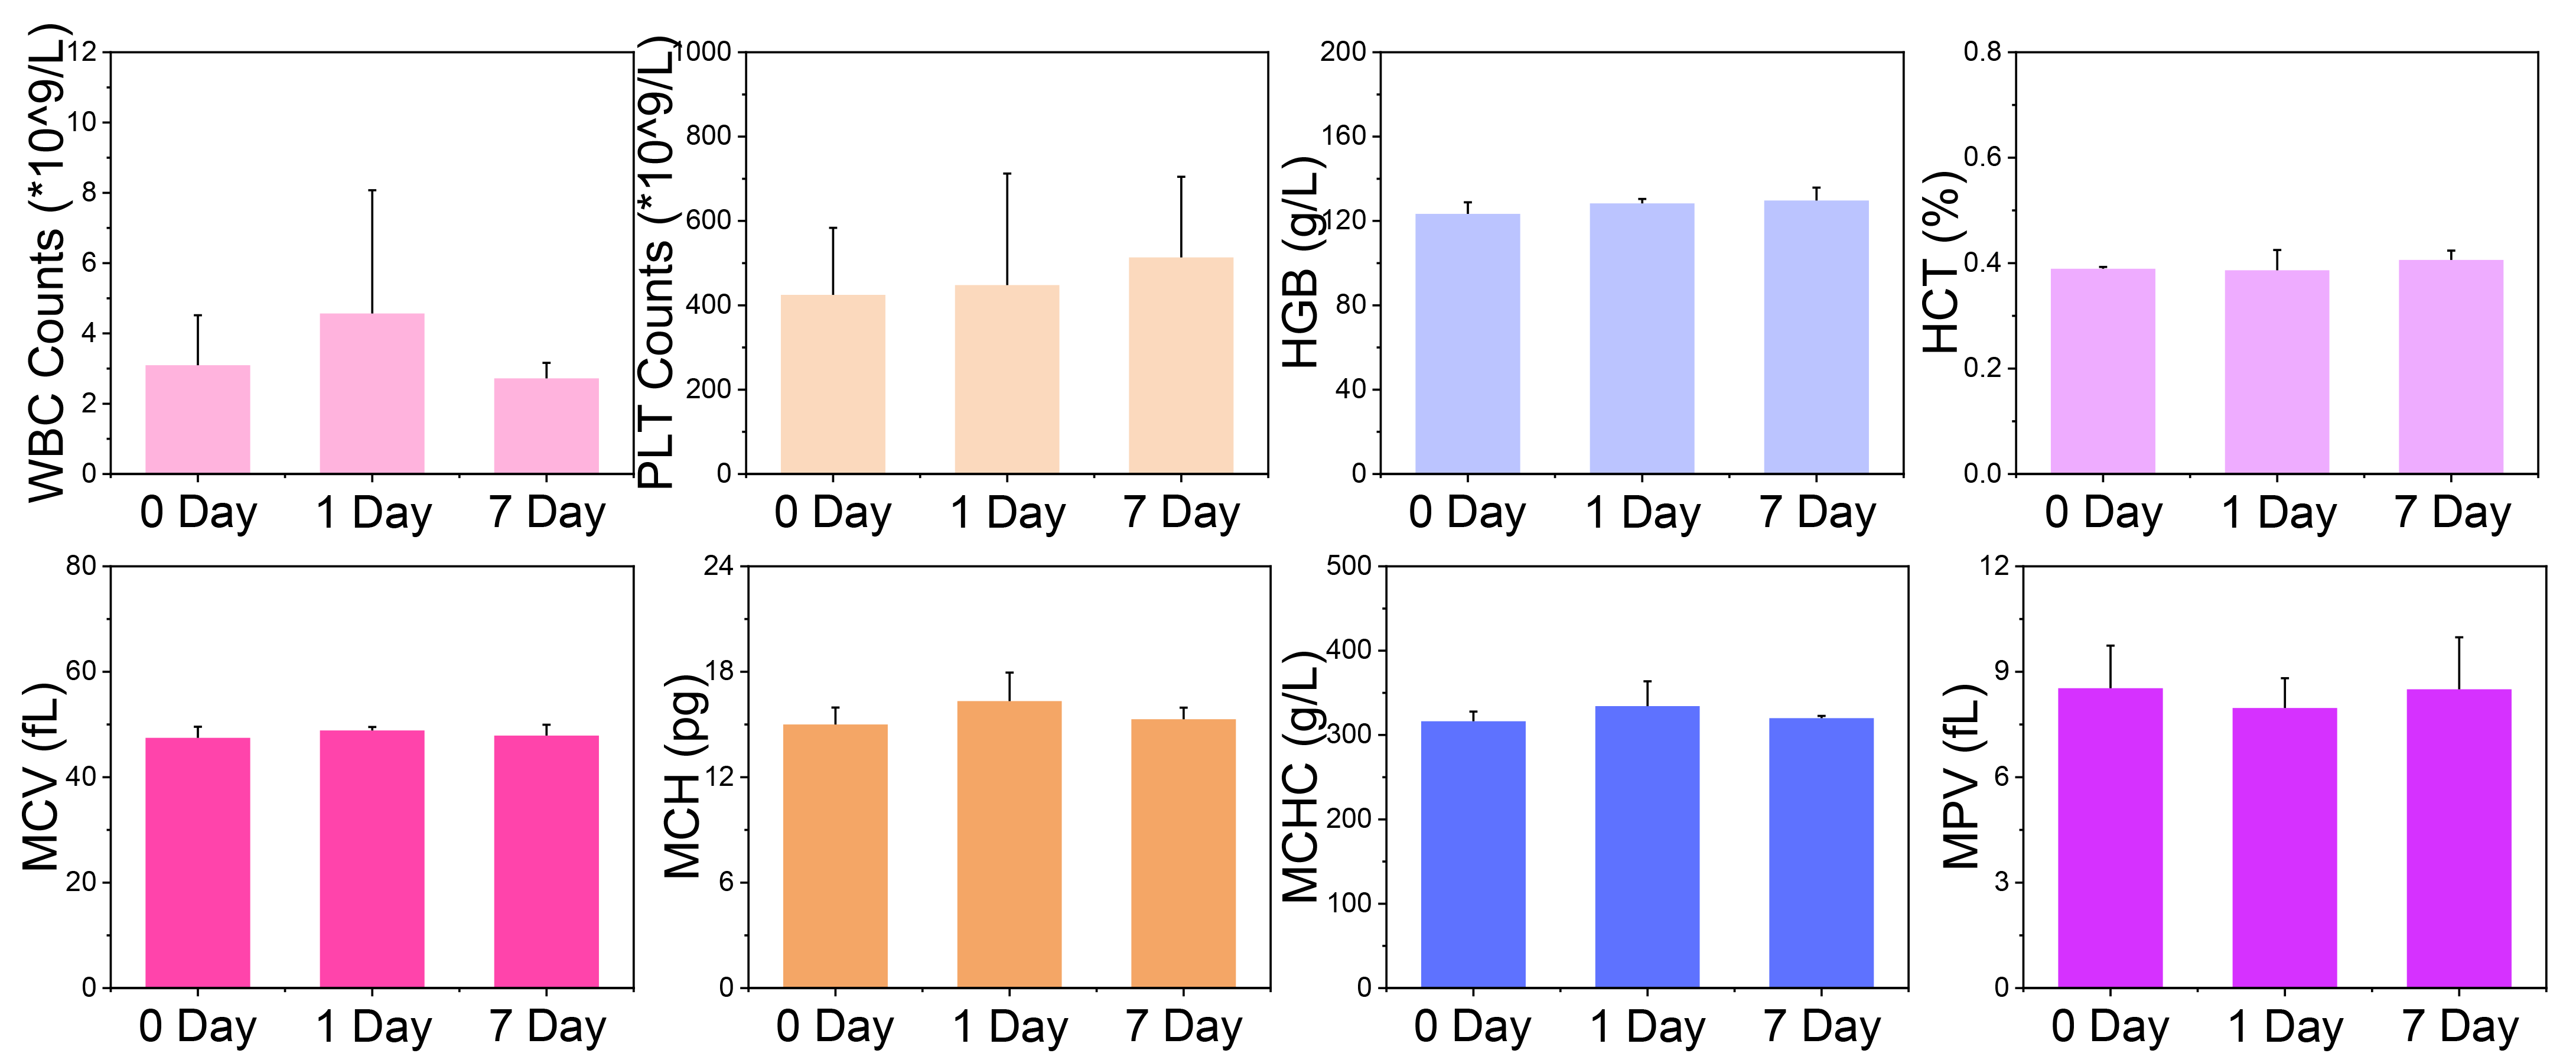
**

**Figure S6.** Blood routine analysis for RC NPs. The error bars indicate means ± SD, n = 3, * p <0.05, ** p <0.01, and *** p <0.001; NS indicates p >0.05.
